# Supplementary material
Source: publisher site journal article supplement (https://www.dovepress.com/article/277392)
Supplement: Supplementary file 1 [file get_supplementary_file.php]

Supplementary Table 1 Demographic and clinical characteristics of the study subjects

|  | Control | Case |
| --- | --- | --- |
| N | 30 | 30 |
| Gender (male %) | 50 | 20 |
| Age | 38.87±11.41 | 32.6±10.87 |
| BMI | 21.54±1.36 | 21.50±1.50 |
| HAMD | \ | 25.37±11.21 |
| MADRS | \ | 31.36±11.49 |

**Note:** BMI, Body Mass Index; HAMD, Hamilton Depression Scale; MADRS, Montgomery-Asberg Depression Rating Scale
